# Supplementary material for: Cancer Association Study of Aminoacyl-tRNA Synthetase Signaling Network in Glioblastoma
Source: PLoS One. 2012 Aug 31;7(8):e40960. doi: 10.1371/journal.pone.0040960 (PMC3432027; doi:10.1371/journal.pone.0040960)
Supplement: Table S1 — Four gene sets including ARSN, DTG, PPI, and nonCAG. (XLS) [file pone.0040960.s024.xls]

## Sheet: TableS1
Table S1. Four gene sets including ARSN, DTG, PPI, and nonCAG
EntrezID	ARSN_23	EntrezID	DTG_124	EntrezID	PPI_404	EntrezID	nonCAG_1874
3735	KARS	4790	NFKB1	5190	PEX6	115123	March_1
7965	AIMP2	8772	FADD	3303	HSPA1A	53947	A4GALT
6897	TARS	48	ACO1	408	ARRB1	9625	AATK
5859	QARS	4255	MGMT	5052	PRDX1	24	ABCA4
4677	NARS	4842	NOS1	902	CCNH	10347	ABCA7
7407	VARS	5788	PTPRC	9972	NUP153	11194	ABCB8
1615	DARS	931	MS4A1	2067	ERCC1	225	ABCD2
16	AARS	1490	CTGF	6198	RPS6KB1	64240	ABCG5
6301	SARS	5406	PNLIP	3320	HSP90AA1	25841	ABTB2
3035	HARS	967	CD63	8317	CDC7	41	ACCN2
9255	AIMP1	978	CDA	5074	PAWR	9311	ACCN3
2193	FARSA	7038	TG	55720	TSR1	55515	ACCN4
2058	EPRS	174	AFP	9612	NCOR2	55289	ACOXL
9521	EEF1E1	3084	NRG1	6461	SHB	49	ACR
2617	GARS	3589	IL11	1399	CRKL	56	ACRV1
4141	MARS	7015	TERT	1036	CDO1	81616	ACSBG2
10056	FARSB	338	APOB	5971	RELB	51412	ACTL6B
5917	RARS	6670	SP3	57761	TRIB3	10881	ACTL7A
7453	WARS	7421	VDR	7415	VCP	10880	ACTL7B
3376	IARS	2074	ERCC6	8237	USP11	81569	ACTL8
833	CARS	3558	IL2	4214	MAP3K1	89	ACTN3
8565	YARS	6590	SLPI	8668	EIF3I	10120	ACTR1B
51520	LARS	183	AGT	5451	POU2F1	8749	ADAM18
		1312	COMT	4163	MCC	145241	ADAM21P1
		348	APOE	9112	MTA1	11085	ADAM30
		354	KLK3	5566	PRKACA	255926	ADAM5P
		7528	YY1	5950	RBP4	80070	ADAMTS20
		3689	ITGB2	3684	ITGAM	9508	ADAMTS3
		581	BAX	5621	PRNP	9719	ADAMTSL2
		3845	KRAS	3551	IKBKB	105	ADARB2
		3106	HLA-B	7184	HSP90B1	79934	ADCK4
		4900	NRGN	7534	YWHAZ	55811	ADCY10
		50943	FOXP3	3015	H2AFZ	112	ADCY6
		4780	NFE2L2	5753	PTK6	131	ADH7
		595	CCND1	2113	ETS1	135	ADORA2A
		1647	GADD45A	10499	NCOA2	151	ADRA2B
		7037	TFRC	7178	TPT1	152	ADRA2C
		4763	NF1	10243	GPHN	155	ADRB3
		7066	THPO	1509	CTSD	79841	AGBL2
		6288	SAA1	641	BLM	181	AGRP
		6876	TAGLN	1523	CUX1	51327	AHSP
		1081	CGA	10755	GIPC1	23746	AIPL1
		213	ALB	6772	STAT1	326	AIRE
		958	CD40	2035	EPB41	8852	AKAP4
		6121	RPE65	59272	ACE2	9495	AKAP5
		1234	CCR5	8106	PABPN1	55389	AKIRIN2-AS1
		4088	SMAD3	2805	GOT1	1109	AKR1C4
		355	FAS	4666	NACA	6718	AKR1D1
		10599	SLCO1B1	1815	DRD4	64577	ALDH8A1
		3880	KRT19	10044	SH2D3C	228	ALDOAP2
		7329	UBE2I	2967	GTF2H3	79087	ALG12
		1026	CDKN1A	6517	SLC2A4	8846	ALKBH1
		5196	PF4	6134	RPL10	54784	ALKBH4
		914	CD2	5577	PRKAR2B	55821	ALLC
		672	BRCA1	4609	MYC	242	ALOX12B
		26136	TES	1213	CLTC	245	ALOX12P2
		328	APEX1	8517	IKBKG	59344	ALOXE3
		2952	GSTT1	10236	HNRNPR	57538	ALPK3
		7042	TGFB2	1511	CTSG	79800	ALS2CR8
		5741	PTH	71	ACTG1	60529	ALX4
		4916	NTRK3	1432	MAPK14	390616	ANKRD34C
		1956	EGFR	8204	NRIP1	54851	ANKRD49
		4541	ND6	7277	TUBA4A	79722	ANKRD55
		9308	CD83	990	CDC6	56311	ANKRD7
		4846	NOS3	5707	PSMD1	57101	ANO2
		3297	HSF1	6935	ZEB1	63982	ANO3
		1583	CYP11A1	509	ATP5C1	80035	ANP32A-IT1
		335	APOA1	5901	RAN	314	AOC2
		652	BMP4	6955	TRA@	90586	AOC4
		2194	FASN	8881	CDC16	8120	AP3B2
		5340	PLG	55593	OTUD5	23431	AP4E1
		933	CD22	4478	MSN	9179	AP4M1
		3146	HMGB1	191	AHCY	10307	APBB3
		5914	RARA	7514	XPO1	51074	APIP
		4683	NBN	6642	SNX1	333	APLP1
		4082	MARCKS	5198	PFAS	337	APOA4
		2272	FHIT	4869	NPM1	10930	APOBEC2
		1544	CYP1A2	1314	COPA	345	APOC3
		440	ASNS	7182	NR2C2	346	APOC4
		4548	MTR	6347	CCL2	319	APOF
		1071	CETP	7068	THRB	80831	APOL5
		2908	NR3C1	2887	GRB10	363	AQP6
		5743	PTGS2	10013	HDAC6	23237	ARC
		93659	CGB5	8556	CDC14A	84364	ARFGAP2
		5358	PLS3	1455	CSNK1G2	9824	ARHGAP11A
		5587	PRKD1	5437	POLR2H	58504	ARHGAP22
		1555	CYP2B6	64780	MICAL1	398	ARHGDIG
		3481	IGF2	5441	POLR2L	54848	ARHGEF38
		1440	CSF3	121504	HIST4H4	23568	ARL2BP
		7157	TP53	7186	TRAF2	55130	ARMC4
		5141	PDE4A	5371	PML	10777	ARPP21
		151888	BTLA	5550	PREP	407	ARR3
		3055	HCK	1315	COPB1	416	ARSF
		4909	NTF4	23479	ISCU	417	ART1
		7428	VHL	4353	MPO	419	ART3
		2885	GRB2	3866	KRT15	29065	ASAP1-IT1
		2678	GGT1	3304	HSPA1B	140462	ASB9
		1841	DTYMK	6403	SELP	56676	ASCL3
		7172	TPMT	3815	KIT	432	ASGR1
		63897	HEATR6	25824	PRDX5	433	ASGR2
		55894	DEFB103A	7203	CCT3	439	ASNA1
		9154	SLC28A1	2099	ESR1	79915	ATAD5
		1890	TYMP	1814	DRD3	23130	ATG2A
		5244	ABCB4	7124	TNF	79065	ATG9A
		5251	PHEX	2071	ERCC3	478	ATP1A3
		79001	VKORC1	11345	GABARAPL2	23439	ATP1B4
		4733	DRG1	7153	TOP2A	487	ATP2A1
		366	AQP9	8793	TNFRSF10D	492	ATP2B3
		199713	NLRP7	50	ACO2	496	ATP4B
		4507	MTAP	7189	TRAF6	534	ATP6V1G2
		10257	ABCC4	142	PARP1	79895	ATP8B4
		92815	HIST3H2A	6257	RXRB	92552	ATXN3L
		3562	IL3	9049	AIP	6315	ATXN8OS
		945	CD33	6850	SYK	22994	AZI1
		3117	HLA-DQA1	79016	DDA1	8708	B3GALT1
		1807	DPYS	367	AR	79369	B3GNT4
		94025	MUC16	157	ADRBK2	8704	B4GALT2
		30833	NT5C	7916	BAT2	80776	B9D2
		133	ADM	3305	HSPA1L	570	BAAT
		6037	RNASE3	1937	EEF1G	7917	BAG6
		3497	IGHE	10146	G3BP1	22893	BAHD1
		4524	MTHFR	5705	PSMC5	576	BAI2
		6564	SLC15A1	6119	RPA3	56033	BARX1
		9	NAT1	8648	NCOA1	593	BCKDHA
				1778	DYNC1H1	10295	BCKDK
				3312	HSPA8	53630	BCMO1
				8894	EIF2S2	617	BCS1L
				1999	ELF3	146227	BEAN1
				8243	SMC1A	57596	BEGAIN
				2597	GAPDH	54831	BEST2
				5719	PSMD13	631	BFSP1
				51726	DNAJB11	8419	BFSP2
				5576	PRKAR2A	80114	BICC1
				5601	MAPK9	9210	BMP15
				1022	CDK7	51027	BOLA1
				2547	XRCC6	60467	BPESC1
				5915	RARB	671	BPI
				5575	PRKAR1B	7862	BRPF1
				3329	HSPD1	8927	BSN
				56288	PARD3	683	BST1
				5888	RAD51	696	BTN1A1
				673	BRAF	54718	BTN2A3P
				5970	RELA	26148	C10orf12
				5584	PRKCI	27291	C10orf28
				4645	MYO5B	79741	C10orf68
				9524	TECR	80007	C10orf88
				10598	AHSA1	54777	C10orf92
				3185	HNRNPF	79946	C10orf95
				9611	NCOR1	56673	C11orf16
				10397	NDRG1	25858	C11orf20
				27257	LSM1	25906	C11orf51
				11200	CHEK2	83638	C11orf68
				8661	EIF3A	93081	C13orf27
				10382	TUBB4	55195	C14orf105
				5156	PDGFRA	56936	C14orf162
				2057	EPOR	89919	C14orf56
				10492	SYNCRIP	60686	C14orf93
				23633	KPNA6	23742	C15orf2
				5716	PSMD10	80072	C15orf34
				1356	CP	750	C16orf3
				7975	MAFK	9605	C16orf7
				6790	AURKA	146562	C16orf71
				6304	SATB1	78995	C17orf53
				2023	ENO1	54785	C17orf59
				5684	PSMA3	255057	C19orf26
				7334	UBE2N	91442	C19orf40
				5431	POLR2B	284325	C19orf54
				5710	PSMD4	79173	C19orf57
				6188	RPS3	55150	C19orf73
				4729	NDUFV2	55908	C19orf80
				5436	POLR2G	92346	C1orf105
				3837	KPNB1	80133	C1orf129
				4673	NAP1L1	54991	C1orf159
				940	CD28	339457	C1orf222
				5829	PXN	10485	C1orf61
				1457	CSNK2A1	100129271	C1orf68
				3988	LIPA	10882	C1QL1
				3192	HNRNPU	79025	C20orf195
				7525	YES1	56245	C21orf62
				60487	TRMT11	55267	C22orf26
				3654	IRAK1	25770	C22orf31
				23193	GANAB	51233	C22orf43
				54971	BANP	54980	C2orf42
				5440	POLR2K	80304	C2orf44
				5595	MAPK3	343990	C2orf55
				7316	UBC	56918	C2orf83
				51655	RASD1	51066	C3orf32
				471	ATIC	80111	C3orf36
				55290	BRF2	711	C3orf51
				8795	TNFRSF10B	10141	C4orf6
				1072	CFL1	80006	C5orf44
				5501	PPP1CC	51149	C5orf45
				5657	PRTN3	10665	C6orf10
				60	ACTB	79747	C6orf103
				3725	JUN	653483	C6orf124
				8826	IQGAP1	29113	C6orf15
				1831	TSC22D3	80069	C6orf208
				57062	DDX24	80739	C6orf25
				2950	GSTP1	57827	C6orf47
				6256	RXRA	80129	C6orf97
				472	ATM	78996	C7orf49
				4794	NFKBIE	80099	C7orf69
				6310	ATXN1	731	C8A
				5567	PRKACB	732	C8B
				3164	NR4A1	733	C8G
				8607	RUVBL1	55472	C8orf39
				8454	CUL1	56260	C8orf44
				5464	PPA1	78998	C8orf51
				3326	HSP90AB1	619426	C8orf60
				5591	PRKDC	735	C9
				22948	CCT5	57000	C9orf31
				5054	SERPINE1	29044	C9orf38
				10660	LBX1	51198	C9orf53
				1965	EIF2S1	763	CA5A
				1387	CREBBP	11238	CA5B
				841	CASP8	765	CA6
				7917	BAT3	51475	CABP2
				7392	USF2	56344	CABP5
				51422	PRKAG2	774	CACNA1B
				6613	SUMO2	777	CACNA1E
				26986	PABPC1	778	CACNA1F
				4352	MPL	781	CACNA2D1
				1453	CSNK1D	786	CACNG1
				5478	PPIA	10369	CACNG2
				7317	UBA1	10368	CACNG3
				3593	IL12B	27091	CACNG5
				5573	PRKAR1A	8618	CADPS
				9276	COPB2	793	CALB1
				7454	WAS	794	CALB2
				3178	HNRNPA1	51806	CALML5
				373156	GSTK1	50632	CALY
				3211	HOXB1	815	CAMK2A
				5159	PDGFRB	79012	CAMKV
				675	BRCA2	23125	CAMTA2
				7456	WIPF1	11131	CAPN11
				8805	TRIM24	838	CASP5
				5286	PIK3C2A	844	CASQ1
				4738	NEDD8	856	CATR1
				8295	TRRAP	117155	CATSPER2
				3576	IL8	79820	CATSPERB
				1232	CCR3	57828	CATSPERG
				805	CALM2	869	CBLN1
				3383	ICAM1	1238	CCBP2
				22800	RRAS2	29903	CCDC106
				890	CCNA2	79635	CCDC121
				3065	HDAC1	81576	CCDC130
				25942	SIN3A	9720	CCDC144A
				4286	MITF	80071	CCDC15
				10856	RUVBL2	25790	CCDC19
				383	ARG1	80125	CCDC33
				468	ATF4	284001	CCDC57
				6258	RXRG	83446	CCDC70
				3232	HOXD3	60494	CCDC81
				5465	PPARA	55231	CCDC87
				4215	MAP3K3	26093	CCDC9
				3458	IFNG	881	CCIN
				9968	MED12	886	CCKAR
				91653	BOC	10850	CCL27
				5610	EIF2AK2	1237	CCR8
				6871	TADA2A	10803	CCR9
				4292	MLH1	25819	CCRN4L
				960	CD44	10693	CCT6B
				3659	IRF1	51622	CCZ1
				3838	KPNA2	10871	CD300C
				4791	NFKB2	916	CD3E
				2287	FKBP3	917	CD3G
				1762	DMWD	922	CD5L
				3094	HINT1	10225	CD96
				3702	ITK	11135	CDC42EP1
				7295	TXN	1008	CDH10
				7181	NR2C1	1013	CDH15
				7155	TOP2B	1016	CDH18
				4706	NDUFAB1	28316	CDH20
				27316	RBMX	1007	CDH9
				57834	CYP4F11	10423	CDIPT
				836	CASP3	23552	CDK20
				6741	SSB	8941	CDK5R2
				9782	MATR3	8999	CDKL2
				1915	EEF1A1	6792	CDKL5
				8848	TSC22D1	1038	CDR1
				6667	SP1	1041	CDSN
				6908	TBP	9085	CDY1
				64750	SMURF2	203611	CDY2B
				7791	ZYX	1089	CEACAM4
				10399	GNB2L1	63036	CELA2A
				24148	PRPF6	51032	CELA2B
				545	ATR	10136	CELA3A
				10419	PRMT5	23436	CELA3B
				4843	NOS2	1057	CELP
				5528	PPP2R5D	752014	CEMP1
				7704	ZBTB16	80152	CENPT
				156	ADRBK1	9350	CER1
				79039	DDX54	1068	CETN1
				10092	ARPC5	10877	CFHR4
				5435	POLR2F	81494	CFHR5
				3611	ILK	5199	CFP
				10657	KHDRBS1	116828	CG030
				2033	EP300	51287	CHCHD8
				3841	KPNA5	1117	CHI3L2
				3313	HSPA9	27159	CHIA
				6862	T	1118	CHIT1
				6597	SMARCA4	79643	CHMP6
				27332	ZNF638	91782	CHMP7
				7297	TYK2	8646	CHRD
				6878	TAF6	1129	CHRM2
				6776	STAT5A	1132	CHRM4
				10059	DNM1L	1133	CHRM5
				1994	ELAVL1	57053	CHRNA10
				2158	F9	1135	CHRNA2
				1543	CYP1A1	1137	CHRNA4
				5018	OXA1L	8973	CHRNA6
				31	ACACA	55584	CHRNA9
				9564	BCAR1	1142	CHRNB3
				55937	APOM	1144	CHRND
				80198	MUS81	1145	CHRNE
				4793	NFKBIB	9486	CHST10
				84447	SYVN1	56548	CHST7
				1813	DRD2	64377	CHST8
				5771	PTPN2	23152	CIC
				4967	OGDH	9541	CIR1
				60673	C12orf44	23332	CLASP1
				3978	LIG1	11129	CLASRP
				4093	SMAD9	1180	CLCN1
				7341	SUMO1	1185	CLCN6
				7132	TNFRSF1A	10686	CLDN16
				801	CALM1	26285	CLDN17
				5469	MED1	9080	CLDN9
				1991	ELANE	26253	CLEC4E
				695	BTK	10332	CLEC4M
				3717	JAK2	1198	CLK3
				6175	RPLP0	1208	CLPS
				6777	STAT5B	27098	CLUL1
				2280	FKBP1A	1261	CNGA3
				10666	CD226	79935	CNTD2
				6722	SRF	1271	CNTFR
				7707	ZNF148	53942	CNTN5
				5578	PRKCA	27255	CNTN6
				919	CD247	22796	COG2
				9051	PSTPIP1	1310	COL19A1
				6774	STAT3	10584	COLEC10
				6898	TAT	29099	COMMD9
				9641	IKBKE	50813	COPS7A
				5481	PPID	51004	COQ6
				3667	IRS1	10699	CORIN
				27231	ITGB1BP3	1352	COX10
				10140	TOB1	1339	COX6A2
				865	CBFB	1357	CPA1
				6500	SKP1	1358	CPA2
				930	CD19	10814	CPLX2
				6446	SGK1	1369	CPN1
				2778	GNAS	9362	CPNE6
				1053	CEBPE	29034	CPS1-IT1
				10817	FRS3	23418	CRB1
				4193	MDM2	1397	CRIP2
				382	ARF6	64109	CRLF2
				2130	EWSR1	1401	CRP
				26994	RNF11	1406	CRX
				10818	FRS2	1409	CRYAA
				4830	NME1	1411	CRYBA1
				5928	RBBP4	1412	CRYBA2
				3064	HTT	1413	CRYBA4
				9970	NR1I3	1414	CRYBB1
				7030	TFE3	1416	CRYBB2P1
				1938	EEF2	1417	CRYBB3
				5300	PIN1	1418	CRYGA
				84669	USP32	1419	CRYGB
				152137	CCDC50	1420	CRYGC
				5468	PPARG	1421	CRYGD
				11100	HNRNPUL1	389903	CSAG3
				7067	THRA	1446	CSN1S1
				3987	LIMS1	1447	CSN2
				2059	EPS8	1448	CSN3
				4904	YBX1	114758	CSPG4P1Y
				2357	FPR1	80034	CSRNP3
				5689	PSMB1	1473	CST5
				5071	PARK2	196993	CT62
				6241	RRM2	647288	CTAGE11P
				5568	PRKACG	1489	CTF1
				9759	HDAC4	1496	CTNNA2
				3858	KRT10	29119	CTNNA3
				9451	EIF2AK3	9646	CTR9
				6418	SET	440387	CTRB2
				5430	POLR2A	11330	CTRC
				5605	MAP2K2	1506	CTRL
				9020	MAP3K14	1521	CTSW
				4669	NAGLU	50624	CUZD1
				8218	CLTCL1	9142	CXorf1
				22933	SIRT2	25763	CXorf27
				5646	PRSS3	54967	CXorf48
				3309	HSPA5	51706	CYB5R1
				5894	RAF1	1537	CYC1
				4217	MAP3K5	360155	CYCSP52
				2068	ERCC2	1539	CYLC2
				5460	POU5F1	1549	CYP2A7
				6885	MAP3K7	10858	CYP46A1
				5645	PRSS2	11283	CYP4F8
				3306	HSPA2	9265	CYTH3
				5295	PIK3R1	1600	DAB1
				11337	GABARAP	747	DAGLA
				10902	BRD8	26094	DCAF4
				8202	NCOA3	26063	DECR2
				23327	NEDD4L	81623	DEFB126
				23118	TAB2	79958	DENND1C
				6117	RPA1	25786	DGCR11
						26220	DGCR5
						85359	DGCR6L
						25787	DGCR9
						1607	DGKB
						9162	DGKI
						9785	DHX38
						79132	DHX58
						1735	DIO3
						26102	DKFZP434A062
						26105	DKFZP434C153
						55525	DKFZp547G183
						284649	DKFZP564C196
						401014	DKFZp686O1327
						27120	DKKL1
						9228	DLGAP2
						65989	DLK2
						10683	DLL3
						1749	DLX5
						1761	DMRT1
						8632	DNAH17
						146754	DNAH2
						27019	DNAI1
						25822	DNAJB5
						10126	DNAL4
						1775	DNASE1L2
						58511	DNASE2B
						30836	DNTTIP2
						8448	DOC2A
						8447	DOC2B
						1795	DOCK3
						57171	DOLPP1
						84444	DOT1L
						64174	DPEP2
						64180	DPEP3
						8193	DPF1
						100129460	DPY19L1P1
						349152	DPY19L2P2
						1814	DRD3
						1815	DRD4
						1816	DRD5
						1819	DRG2
						1821	DRP2
						1826	DSCAM
						10281	DSCR4
						53820	DSCR6
						171220	DSTNP2
						1838	DTNB
						51207	DUSP13
						63904	DUSP21
						26584	DUX1
						26581	DUX5
						8444	DYRK3
						11319	ECD
						60401	EDA2R
						23644	EDC4
						64184	EDDM3B
						221154	EFHA1
						1943	EFNA2
						22979	EFR3B
						100126791	EGOT
						64100	ELSPBP1
						2015	EMR1
						84658	EMR3
						2027	ENO3
						954	ENTPD2
						10824	EPAG
						2038	EPB42
						79852	EPHX3
						55380	EPS15P1
						79574	EPS8L3
						8288	EPX
						1833	EPYC
						26284	ERAL1
						26059	ERC2
						2117	ETV3
						2128	EVX1
						55218	EXD2
						5394	EXOSC10
						2155	F7
						151313	FAHD2B
						80039	FAM106A
						55007	FAM118A
						54954	FAM120C
						79843	FAM124B
						131408	FAM131A
						9715	FAM131B
						220965	FAM13C
						285596	FAM153A
						27112	FAM155B
						79696	FAM164C
						284800	FAM182A
						121006	FAM186A
						8603	FAM193A
						389715	FAM205B
						388886	FAM211B
						29064	FAM30A
						60343	FAM3A
						26240	FAM50B
						9679	FAM53B
						57795	FAM5B
						26165	FAM75A7
						645961	FAM75C2
						54854	FAM83E
						55138	FAM90A1
						2196	FAT2
						8789	FBP2
						55336	FBXL8
						26261	FBXO24
						51725	FBXO40
						26226	FBXW4P1
						54738	FEV
						55079	FEZF2
						2243	FGA
						2245	FGD1
						26281	FGF20
						27006	FGF22
						2275	FHL3
						11153	FICD
						51024	FIS1
						79147	FKRP
						59347	FKSG2
						2218	FKTN
						79904	FLJ11710
						79857	FLJ13224
						80094	FLJ14107
						55025	FLJ20712
						79860	FLJ21369
						23769	FLRT1
						388714	FMO6P
						64122	FN3K
						79672	FN3KRP
						54752	FNDC8
						219595	FOLH1B
						27023	FOXB1
						2303	FOXC2
						2306	FOXD2
						27022	FOXD3
						200350	FOXD4L1
						2301	FOXE3
						2299	FOXI1
						92973	FP588
						8790	FPGT
						2358	FPR2
						22844	FRMPD1
						9758	FRMPD4
						25794	FSCN2
						29999	FSCN3
						79187	FSD1
						2488	FSHB
						23105	FSTL4
						8939	FUBP3
						80199	FUZ
						53822	FXYD7
						57818	G6PC2
						2548	GAA
						2554	GABRA1
						2556	GABRA3
						2557	GABRA4
						2558	GABRA5
						2559	GABRA6
						2560	GABRB1
						2561	GABRB2
						2563	GABRD
						2566	GABRG2
						2567	GABRG3
						55879	GABRQ
						2569	GABRR1
						2570	GABRR2
						26290	GALNT8
						8484	GALR3
						8139	GAN
						26330	GAPDHS
						2646	GCKR
						8521	GCM1
						51301	GCNT4
						78997	GDAP1L1
						2661	GDF9
						8328	GFI1B
						64096	GFRA4
						23163	GGA3
						91227	GGTLC2
						54826	GIN1
						28964	GIT1
						2700	GJA3
						2702	GJA5
						81025	GJA9
						127534	GJB4
						57165	GJC2
						57369	GJD2
						2712	GK2
						2742	GLRA2
						23127	GLT25D2
						728564	GMPSP1
						2780	GNAT2
						346562	GNAT3
						51764	GNG13
						2785	GNG3
						2792	GNGT1
						2811	GP1BA
						2814	GP5
						63906	GPATCH3
						2262	GPC5
						2835	GPR12
						64582	GPR135
						2838	GPR15
						27239	GPR162
						29909	GPR171
						55065	GPR172B
						11245	GPR176
						2841	GPR18
						2843	GPR20
						2844	GPR21
						2845	GPR22
						2848	GPR25
						2850	GPR27
						2853	GPR31
						2854	GPR32
						9283	GPR37L1
						2863	GPR39
						11250	GPR45
						9248	GPR50
						9293	GPR52
						2830	GPR6
						81491	GPR63
						10149	GPR64
						8111	GPR68
						10936	GPR75
						27202	GPR77
						54112	GPR88
						222487	GPR97
						55507	GPRC5D
						10750	GRAP
						9402	GRAP2
						80000	GREB1L
						2899	GRIK3
						2904	GRIN2B
						23426	GRIP1
						80852	GRIP2
						6011	GRK1
						2916	GRM6
						79927	GRRP1
						83445	GSG1
						2953	GSTT2
						25774	GSTTP1
						8225	GTPBP6
						2978	GUCA1A
						2979	GUCA1B
						2977	GUCY1A2
						2974	GUCY1B2
						3000	GUCY2D
						2998	GYS2
						3005	H1F0
						474381	H2AFB2
						23498	HAAO
						3034	HAL
						57817	HAMP
						9421	HAND1
						54363	HAO1
						51179	HAO2
						60484	HAPLN2
						3044	HBBP1
						3046	HBE1
						3049	HBQ1
						3050	HBZ
						8843	HCAR3
						352961	HCG26
						54435	HCG4
						80868	HCG4B
						10021	HCN4
						3060	HCRT
						8820	HESX1
						100128124	HGC6.3
						79802	HHIPL2
						10086	HHLA1
						8479	HIRIP3
						3024	HIST1H1A
						3009	HIST1H1B
						3007	HIST1H1D
						3010	HIST1H1T
						8335	HIST1H2AB
						3012	HIST1H2AE
						8329	HIST1H2AI
						8330	HIST1H2AK
						8332	HIST1H2AL
						8336	HIST1H2AM
						3018	HIST1H2BB
						8970	HIST1H2BJ
						8340	HIST1H2BL
						8341	HIST1H2BN
						8348	HIST1H2BO
						8350	HIST1H3A
						8358	HIST1H3B
						8352	HIST1H3C
						8353	HIST1H3E
						8968	HIST1H3F
						8355	HIST1H3G
						8354	HIST1H3I
						8356	HIST1H3J
						8366	HIST1H4B
						8360	HIST1H4D
						8367	HIST1H4E
						8361	HIST1H4F
						8369	HIST1H4G
						8368	HIST1H4L
						8337	HIST2H2AA3
						554313	HIST2H4B
						8290	HIST3H3
						3096	HIVEP1
						3112	HLA-DOB
						3120	HLA-DQB2
						51617	HMP19
						3166	HMX1
						3174	HNF4G
						50809	HP1BP3
						51440	HPCAL4
						55806	HR
						27251	HR44
						3270	HRC
						11255	HRH3
						59340	HRH4
						128102	HSD3BP4
						11077	HSF2BP
						3299	HSF4
						100130086	HSFX2
						8988	HSPB3
						29075	HSPC072
						3346	HTN1
						3347	HTN3
						3355	HTR1F
						3357	HTR2B
						3359	HTR3A
						9177	HTR3B
						93164	HTR7P1
						23553	HYAL4
						7087	ICAM5
						22858	ICK
						84099	ID2B
						55853	IDI2-AS1
						3446	IFNA10
						3448	IFNA14
						3449	IFNA16
						3452	IFNA21
						3441	IFNA4
						3442	IFNA5
						3444	IFNA7
						3445	IFNA8
						3467	IFNW1
						90410	IFT20
						3483	IGFALS
						3493	IGHA1
						3508	IGHMBP2
						22997	IGSF9B
						3592	IL12A
						3593	IL12B
						3594	IL12RB1
						27190	IL17B
						8807	IL18RAP
						29949	IL19
						11141	IL1RAPL1
						26280	IL1RAPL2
						8808	IL1RL2
						64806	IL25
						27179	IL36A
						56300	IL36G
						26525	IL36RN
						3565	IL4
						3612	IMPA1
						3617	IMPG1
						50939	IMPG2
						8552	INE1
						3626	INHBC
						56623	INPP5E
						27124	INPP5J
						10022	INSL5
						11172	INSL6
						55756	INTS9
						10526	IPO8
						440073	IQSEC3
						26145	IRF2BP1
						56269	IRGC
						8471	IRS4
						10265	IRX5
						8515	ITGA10
						27231	ITGB1BP3
						3697	ITIH1
						3698	ITIH2
						80271	ITPKC
						9832	JAKMIP2
						57158	JPH2
						2648	KAT2A
						9920	KBTBD11
						3744	KCNA10
						9196	KCNAB3
						9312	KCNB2
						3750	KCND1
						23630	KCNE1L
						9992	KCNE2
						3754	KCNF1
						3755	KCNG1
						26251	KCNG2
						23415	KCNH4
						30820	KCNIP1
						30819	KCNIP2
						3758	KCNJ1
						3768	KCNJ12
						3770	KCNJ14
						3761	KCNJ4
						3763	KCNJ6
						3765	KCNJ9
						56660	KCNK12
						60598	KCNK15
						10089	KCNK7
						27094	KCNMB3
						3786	KCNQ3
						3787	KCNS1
						169522	KCNV2
						79734	KCTD17
						9682	KDM4A
						55693	KDM4D
						11081	KERA
						100129128	KHDC1L
						202559	KHDRBS2
						9808	KIAA0087
						9834	KIAA0125
						9856	KIAA0319
						79932	KIAA0319L
						57242	KIAA0509
						9847	KIAA0528
						23247	KIAA0556
						9786	KIAA0586
						9851	KIAA0753
						23251	KIAA1024
						57613	KIAA1467
						57710	KIAA1614
						85375	KIAA1661
						85452	KIAA1751
						57576	KIF17
						23046	KIF21B
						347240	KIF24
						3834	KIF25
						3798	KIF5A
						3801	KIFC3
						3805	KIR2DL4
						57292	KIR2DL5A
						3808	KIR2DS3
						3809	KIR2DS4
						3810	KIR2DS5
						90011	KIR3DX1
						64837	KLC2
						54758	KLHDC4
						57626	KLHL1
						55175	KLHL11
						23276	KLHL18
						64410	KLHL25
						79786	KLHL36
						56062	KLHL4
						8302	KLRC4
						10219	KLRG1
						3859	KRT12
						3849	KRT2
						192666	KRT24
						3850	KRT3
						3882	KRT32
						3883	KRT33A
						3884	KRT33B
						3886	KRT35
						8689	KRT36
						8688	KRT37
						9119	KRT75
						51350	KRT76
						3887	KRT81
						3889	KRT83
						3890	KRT84
						3891	KRT85
						3892	KRT86
						149501	KRT8P45
						81851	KRTAP1-1
						81850	KRTAP1-3
						57830	KRTAP5-8
						3846	KRTAP5-9
						81870	KRTAP9-9
						3904	LAIR2
						3906	LALBA
						3929	LBP
						10660	LBX1
						26239	LCE2B
						92483	LDHAL6B
						10637	LEFTY1
						55891	LENEP
						54741	LEPROT
						3955	LFNG
						29124	LGALS13
						56891	LGALS14
						3972	LHB
						8022	LHX3
						64211	LHX5
						11019	LIAS
						11024	LILRA1
						11026	LILRA3
						79168	LILRA6
						10990	LILRB5
						79166	LILRP2
						3982	LIM2
						80774	LIMD2
						388699	LINC00302
						654434	LINC00338
						29092	LINC00339
						58483	LINC00474
						55018	LINC00483
						8513	LIPF
						81562	LMAN2L
						22853	LMTK2
						4010	LMX1B
						100093698	LOC100093698
						100127886	LOC100127886
						100127972	LOC100127972
						100129648	LOC100129648
						100129973	LOC100129973
						100130354	LOC100130354
						100130741	LOC100130741
						100131510	LOC100131510
						100131825	LOC100131825
						145678	LOC145678
						157562	LOC157562
						1720	LOC1720
						220077	LOC220077
						257152	LOC257152
						399904	LOC399904
						400084	LOC400084
						440792	LOC440792
						441601	LOC441601
						442421	LOC442421
						51145	LOC51145
						646934	LOC646934
						650293	LOC650293
						729164	LOC729164
						729806	LOC729806
						730227	LOC730227
						79015	LOC79015
						79999	LOC79999
						93432	LOC93432
						79836	LONRF3
						2846	LPAR4
						79948	LPPR3
						9890	LPPR4
						23143	LRCH1
						79414	LRFN3
						26103	LRIT1
						55805	LRP2BP
						4043	LRPAP1
						81543	LRRC3
						147172	LRRC37BP1
						57470	LRRC47
						83450	LRRC48
						79705	LRRK1
						57408	LRTM1
						80741	LY6G5C
						80740	LY6G6C
						79136	LY6G6E
						4062	LY6H
						57151	LYZL6
						8216	LZTR1
						9587	MAD2L1BP
						4114	MAGEB3
						4115	MAGEB4
						54551	MAGEL2
						9794	MAML1
						10046	MAMLD1
						23324	MAN2B2
						79929	MAP6D1
						5596	MAPK4
						9479	MAPK8IP1
						23542	MAPK8IP2
						23005	MAPKBP1
						8685	MARCO
						22983	MAST1
						8785	MATN4
						8512	MBL1P
						4159	MC3R
						4160	MC4R
						4161	MC5R
						27349	MCAT
						23101	MCF2L2
						4188	MDFI
						51102	MECR
						6837	MED22
						9862	MED24
						55090	MED9
						1954	MEGF8
						4224	MEP1A
						4225	MEP1B
						56257	MEPCE
						79609	METTL21D
						84179	MFSD7
						25834	MGAT4C
						84796	MGC13053
						65996	MGC2752
						84789	MGC2889
						81854	MGC3771
						79160	MGC4294
						79150	MGC4859
						4284	MIP
						54903	MKS1
						23209	MLC1
						2862	MLNR
						25974	MMACHC
						64210	MMS19
						27304	MOCS3
						23515	MORC3
						79906	MORN1
						10199	MPHOSPH10
						758	MPPED1
						114932	MRFAP1L1
						79922	MRM1
						10573	MRPL28
						122704	MRPL52
						932	MS4A3
						64232	MS4A5
						9242	MSC
						4438	MSH4
						2660	MSTN
						84560	MT4
						7978	MTERF
						130916	MTERFD2
						9633	MTL5
						9108	MTMR7
						55613	MTMR8
						4544	MTNR1B
						23281	MTUS2
						4593	MUSK
						4597	MVD
						83463	MXD3
						4604	MYBPC1
						4606	MYBPC2
						4607	MYBPC3
						4608	MYBPH
						10408	MYCNOS
						4619	MYH1
						8735	MYH13
						22989	MYH15
						4620	MYH2
						4621	MYH3
						4622	MYH4
						4624	MYH6
						4625	MYH7
						57644	MYH7B
						4632	MYL1
						4633	MYL2
						4634	MYL3
						4635	MYL4
						58498	MYL7
						29895	MYLPF
						51168	MYO15A
						23026	MYO16
						4640	MYO1A
						53904	MYO3A
						8736	MYOM1
						9499	MYOT
						58529	MYOZ1
						116829	N4BP2L2-IT1
						23138	N4BP3
						84779	NAA11
						23148	NACAD
						57051	NAG18
						64428	NARFL
						1463	NCAN
						23385	NCSTN
						9348	NDST3
						64579	NDST4
						4696	NDUFA3
						56901	NDUFA4L2
						4702	NDUFA8
						4710	NDUFB4
						54550	NECAB2
						63941	NECAB3
						55247	NEIL3
						4759	NEU2
						58158	NEUROD4
						63974	NEUROD6
						63973	NEUROG2
						27247	NFU1
						4803	NGF
						4807	NHLH1
						79570	NKAIN1
						4821	NKX2-2
						579	NKX3-2
						54413	NLGN3
						22829	NLGN4Y
						79159	NOL12
						51070	NOSIP
						4861	NPAS1
						2832	NPBWR2
						29881	NPC1L1
						64106	NPFFR1
						4868	NPHS1
						440348	NPIPL2
						4879	NPPB
						23467	NPTXR
						64111	NPVF
						4888	NPY6R
						9970	NR1I3
						7101	NR2E1
						4897	NRCAM
						83714	NRIP2
						9379	NRXN2
						56953	NT5M
						22854	NTNG1
						318	NUDT2
						56001	NXF2
						56000	NXF3
						11248	NXPH3
						11247	NXPH4
						60506	NYX
						51686	OAZ3
						64859	OBFC2A
						29991	OBP2A
						29989	OBP2B
						10896	OCLM
						4951	OCM2
						8481	OFD1
						55301	OLAH
						3175	ONECUT1
						9480	ONECUT2
						2652	OPN1MW
						611	OPN1SW
						4985	OPRD1
						4986	OPRK1
						4987	OPRL1
						442194	OR10C1
						26539	OR10H1
						26538	OR10H2
						26532	OR10H3
						26476	OR10J1
						26531	OR11A1
						26529	OR12D2
						81797	OR12D3
						8383	OR1A1
						26189	OR1A2
						4991	OR1D2
						4992	OR1F1
						26184	OR1F2P
						8390	OR1G1
						81697	OR2B2
						26212	OR2B6
						4993	OR2C1
						26211	OR2F1
						135948	OR2F2
						26716	OR2H1
						7932	OR2H2
						26707	OR2J2
						442186	OR2J3
						56656	OR2S2
						26692	OR2W1
						4994	OR3A1
						4995	OR3A2
						8392	OR3A3
						23538	OR52A1
						10798	OR5I1
						81696	OR5V1
						8590	OR6A2
						26333	OR7A17
						26659	OR7A5
						26664	OR7C1
						26658	OR7C2
						283491	OR7E156P
						26651	OR7E19P
						26648	OR7E24
						55644	OSGEP
						64172	OSGEPL1
						9381	OTOF
						23252	OTUD3
						728361	OVOL3
						5018	OXA1L
						5020	OXT
						5028	P2RY1
						5031	P2RY6
						79646	PANK3
						55229	PANK4
						56903	PAPOLB
						79957	PAQR6
						50855	PARD6A
						55486	PARL
						54956	PARP16
						10039	PARP3
						5075	PAX1
						54039	PCBP3
						83259	PCDH11Y
						5100	PCDH8
						56139	PCDHA10
						56145	PCDHA3
						56143	PCDHA5
						56142	PCDHA6
						9752	PCDHA9
						29930	PCDHB1
						56125	PCDHB11
						56124	PCDHB12
						56132	PCDHB3
						56130	PCDHB6
						56128	PCDHB8
						56114	PCDHGA1
						56106	PCDHGA10
						9708	PCDHGA8
						56107	PCDHGA9
						56101	PCDHGB5
						58488	PCTP
						5132	PDC
						5153	PDE1B
						5139	PDE3A
						5145	PDE6A
						5158	PDE6B
						5146	PDE6C
						5148	PDE6G
						5149	PDE6H
						5161	PDHA2
						79955	PDZD7
						5179	PENK
						5188	PET112
						5193	PEX12
						51555	PEX5L
						5190	PEX6
						5201	PFDN1
						5222	PGA5
						5224	PGAM2
						5232	PGK2
						8993	PGLYRP1
						57115	PGLYRP4
						221692	PHACTR1
						5260	PHKG1
						401	PHOX2A
						9796	PHYHIP
						9463	PICK1
						9091	PIGQ
						5301	PIN1P1
						23761	PISD
						55124	PIWIL2
						9033	PKD2L1
						27039	PKD2L2
						10343	PKDREJ
						23659	PLA2G15
						26279	PLA2G2D
						30814	PLA2G2E
						64600	PLA2G2F
						10761	PLAC1
						191585	PLAC4
						9651	PLCH2
						55344	PLCXD1
						57664	PLEKHA4
						79156	PLEKHF1
						55200	PLEKHG6
						79990	PLEKHH3
						57047	PLSCR2
						5367	PMCH
						83449	PMFBP1
						5375	PMP2
						5382	PMS2P4
						5368	PNOC
						57104	PNPLA2
						79883	PODNL1
						27343	POLL
						9883	POM121
						94026	POM121L2
						10585	POMT1
						29954	POMT2
						64091	POPDC2
						64208	POPDC3
						64840	PORCN
						5449	POU1F1
						5453	POU3F1
						5455	POU3F3
						5456	POU3F4
						5462	POU5F1B
						642559	POU5F1P3
						645682	POU5F1P4
						100129503	PP13
						10895	PPBPL2
						5475	PPEF1
						5470	PPEF2
						8541	PPFIA3
						8497	PPFIA4
						22843	PPM1E
						5498	PPOX
						54866	PPP1R14D
						10842	PPP1R17
						80316	PPP1R2P9
						9374	PPT2
						23614	PPY2
						54896	PQLC2
						65121	PRAMEF1
						343071	PRAMEF10
						440560	PRAMEF11
						390999	PRAMEF12
						5545	PRB4
						56981	PRDM11
						56978	PRDM8
						56979	PRDM9
						10394	PRG3
						10216	PRG4
						4007	PRICKLE3
						5568	PRKACG
						5571	PRKAG1
						8575	PRKRA
						51052	PRLH
						5619	PRM1
						5620	PRM2
						56341	PRMT8
						29018	PRO1768
						55478	PRO2012
						55415	PRO2964
						5624	PROC
						58510	PRODH2
						58503	PROL1
						8858	PROZ
						55015	PRPF39
						5961	PRPH2
						221823	PRPS1L1
						5636	PRPSAP2
						80742	PRR3
						11272	PRR4
						79057	PRRG3
						8492	PRSS12
						10279	PRSS16
						5662	PSD
						5680	PSG11
						5670	PSG2
						5671	PSG3
						5672	PSG4
						5676	PSG7
						5678	PSG9
						5681	PSKH1
						5715	PSMD9
						9051	PSTPIP1
						81490	PTDSS2
						5746	PTH2R
						26095	PTPN20B
						10744	PTTG2
						79037	PVRIG
						5834	PYGB
						26108	PYGO1
						23615	PYY2
						54814	QPCTL
						22864	R3HDM2
						26056	RAB11FIP5
						5866	RAB3IL1
						142684	RAB40A
						282808	RAB40AL
						9366	RAB9BP1
						10244	RABEPK
						5875	RABGGTA
						23132	RAD54L2
						26953	RANBP6
						5913	RAPSN
						9182	RASSF9
						54715	RBFOX1
						83759	RBM4B
						27288	RBMXL2
						11317	RBPJL
						8608	RDH16
						50700	RDH8
						51308	REEP2
						56729	RETN
						5988	RFPL1
						10740	RFPL1-AS1
						10739	RFPL2
						10738	RFPL3
						10737	RFPL3-AS1
						5994	RFXAP
						9827	RGP1
						5995	RGR
						6000	RGS7
						9028	RHBDL1
						57127	RHBG
						6006	RHCE
						26150	RIBC2
						22999	RIMS1
						6014	RIT2
						6017	RLBP1
						6013	RLN1
						55298	RNF121
						79845	RNF122
						376412	RNF126P1
						91445	RNF185
						55182	RNF220
						64320	RNF25
						6094	ROM1
						152015	ROPN1B
						6096	RORB
						6102	RP2
						6118	RPA2
						29935	RPA4
						26015	RPAP1
						57096	RPGRIP1
						22895	RPH3A
						283345	RPL13P5
						644128	RPL23AP53
						6164	RPL34
						6123	RPL3L
						6231	RPS26
						80052	RPS2P45
						8986	RPS6KA4
						10325	RRAGB
						10692	RRH
						51093	RRNAD1
						6247	RS1
						55316	RSAD1
						79363	RSG1
						81492	RSPH6A
						10900	RUNDC3A
						9853	RUSC2
						51389	RWDD1
						51289	RXFP3
						6262	RYR2
						6271	S100A1
						795	S100G
						8698	S1PR4
						55511	SAGE1
						201191	SAMD14
						79595	SAP130
						54938	SARS2
						192683	SCAMP5
						10648	SCGB1D1
						22955	SCMH1
						10389	SCML2
						6323	SCN1A
						6324	SCN1B
						6329	SCN4A
						6331	SCN5A
						6334	SCN8A
						6339	SCNN1D
						11341	SCRG1
						79634	SCRN3
						6343	SCT
						284904	SEC14L4
						9717	SEC14L5
						223117	SEMA3D
						10500	SEMA6C
						8482	SEMA7A
						51156	SERPINA10
						390502	SERPINA2
						5055	SERPINB2
						5271	SERPINB8
						462	SERPINC1
						9739	SETD1A
						23067	SETD1B
						6442	SGCA
						6445	SGCG
						6448	SGSH
						6449	SGTA
						10603	SH2B2
						23616	SH3BP1
						79729	SH3D21
						6456	SH3GL2
						79628	SH3TC2
						50944	SHANK1
						81626	SHCBP1L
						6473	SHOX
						357	SHROOM2
						284266	SIGLEC15
						55423	SIRPG
						23409	SIRT4
						27240	SIT1
						8631	SKAP1
						6499	SKIV2L
						8273	SLC10A3
						6559	SLC12A3
						57468	SLC12A5
						8170	SLC14A2
						6567	SLC16A2
						23539	SLC16A8
						10246	SLC17A2
						10786	SLC17A3
						57084	SLC17A6
						6572	SLC18A3
						6511	SLC1A6
						6512	SLC1A7
						55867	SLC22A11
						9390	SLC22A13
						9389	SLC22A14
						6582	SLC22A2
						9356	SLC22A6
						25769	SLC24A2
						83447	SLC25A31
						10861	SLC26A1
						65012	SLC26A10
						64078	SLC28A3
						7781	SLC30A3
						6569	SLC34A1
						9906	SLC35E2
						29986	SLC39A2
						51151	SLC45A2
						6508	SLC4A3
						57835	SLC4A5
						60482	SLC5A7
						6529	SLC6A1
						6538	SLC6A11
						6539	SLC6A12
						6540	SLC6A13
						55117	SLC6A15
						9152	SLC6A5
						6534	SLC6A7
						6536	SLC6A9
						56301	SLC7A10
						6545	SLC7A4
						11136	SLC7A9
						6543	SLC8A2
						9351	SLC9A3R2
						84679	SLC9A7
						53919	SLCO1C1
						81796	SLCO5A1
						6588	SLN
						4184	SMCP
						10285	SMNDC1
						23676	SMPX
						26952	SMR3A
						9892	SNAP91
						6618	SNAPC2
						27099	SND1-IT1
						8420	SNHG3
						26782	SNORA66
						11066	SNRNP35
						54212	SNTG1
						29907	SNX15
						9784	SNX17
						92017	SNX29
						8435	SOAT2
						30837	SOCS7
						22986	SORCS3
						8403	SOX14
						11166	SOX21
						11063	SOX30
						6660	SOX5
						160824	SP3P
						6671	SP4
						81833	SPACA1
						653423	SPAG11A
						10407	SPAG11B
						64847	SPATA20
						124044	SPATA2L
						25876	SPEF1
						54466	SPIN2A
						6691	SPINK2
						27290	SPINK4
						57119	SPINLW1
						10816	SPINT3
						6694	SPP2
						6702	SPRR2C
						6710	SPTB
						55133	SRBD1
						26576	SRPK3
						23648	SSBP3
						8636	SSNA1
						29906	ST8SIA5
						10734	STAG3
						80765	STARD5
						10494	STK25
						55351	STK32B
						81551	STMN4
						6801	STRN
						53407	STX18
						6811	STX5
						25830	SULT4A1
						6829	SUPT5H
						6835	SURF2
						22987	SV2C
						10388	SYCP2
						25949	SYF2
						8224	SYN3
						23546	SYNGR4
						127833	SYT2
						6861	SYT5
						6862	T
						9287	TAAR2
						9288	TAAR3
						9038	TAAR5
						10454	TAB1
						6865	TACR2
						6870	TACR3
						6883	TAF12
						6884	TAF13
						6875	TAF4B
						6877	TAF5
						27097	TAF5L
						10629	TAF6L
						54457	TAF7L
						29114	TAGLN3
						50834	TAS2R1
						50839	TAS2R10
						50838	TAS2R13
						50833	TAS2R16
						50831	TAS2R3
						50832	TAS2R4
						50837	TAS2R7
						50836	TAS2R8
						50835	TAS2R9
						9797	TATDN2
						6901	TAZ
						55296	TBC1D19
						25771	TBC1D22A
						26083	TBC1D29
						6903	TBCC
						9755	TBKBP1
						90665	TBL1Y
						9519	TBPL1
						10716	TBR1
						347853	TBX10
						9095	TBX19
						6911	TBX6
						8557	TCAP
						51224	TCEB3B
						6939	TCF15
						6953	TCP10
						6954	TCP11
						56165	TDRD1
						91646	TDRD12
						7007	TECTA
						27285	TEKT2
						7016	TESK1
						56158	TEX12
						56157	TEX13A
						56156	TEX13B
						56155	TEX14
						56154	TEX15
						1527	TEX28
						51270	TFDP3
						24144	TFIP11
						9392	TGFBRAP1
						9333	TGM5
						90326	THAP3
						80764	THAP7
						79725	THAP9
						51298	THEG
						55258	THNSL2
						26230	TIAM2
						81789	TIGD6
						64129	TINAGL1
						7093	TLL2
						10333	TLR6
						79853	TM4SF20
						7104	TM4SF4
						81501	TM7SF4
						9375	TM9SF2
						79905	TMC7
						9911	TMCC2
						54868	TMEM104
						8834	TMEM11
						80757	TMEM121
						79847	TMEM180
						8269	TMEM187
						729515	TMEM242
						55287	TMEM40
						25789	TMEM59L
						9407	TMPRSS11D
						286527	TMSB15B
						79089	TMUB2
						8744	TNFSF9
						79931	TNIP3
						64102	TNMD
						63923	TNN
						7125	TNNC2
						7135	TNNI1
						7136	TNNI2
						51086	TNNI3K
						7139	TNNT2
						7141	TNP1
						114034	TOE1
						4796	TONSL
						24150	TP53TG3
						27296	TP53TG5
						25823	TPSG1
						7179	TPTE
						26146	TRAF3IP1
						6399	TRAPPC2
						28683	TRAV8-3
						28584	TRBV10-2
						10345	TRDN
						79865	TREML2
						9865	TRIL
						51127	TRIM17
						6737	TRIM21
						7726	TRIM26
						79097	TRIM48
						79979	TRMT2B
						7221	TRPC2
						7224	TRPC5
						7225	TRPC6
						59341	TRPV4
						56302	TRPV5
						81628	TSC22D4
						7257	TSNAX
						55815	TSNAXIP1
						10077	TSPAN32
						222642	TSPO2
						90121	TSR2
						83942	TSSK1B
						23617	TSSK2
						51112	TTC15
						79809	TTC21B
						92104	TTC30A
						9694	TTC35
						80185	TTI2
						25809	TTLL1
						79739	TTLL7
						7274	TTPA
						64595	TTTY15
						100101116	TTTY1B
						100101117	TTTY2B
						51807	TUBA8
						79861	TUBAL3
						10382	TUBB4A
						56604	TUBB7P
						27175	TUBG2
						7288	TULP2
						11344	TWF2
						7294	TXK
						51314	TXNDC3
						10422	UBAC1
						53347	UBASH3A
						22888	UBOX5
						50613	UBQLN3
						80019	UBTD1
						137886	UBXN2B
						10941	UGT2A1
						8408	ULK1
						23025	UNC13A
						25972	UNC50
						80761	UPK3B
						7399	USH2A
						10868	USP20
						57663	USP29
						8078	USP5
						25806	VAX2
						7423	VEGFB
						27287	VENTX
						57191	VN1R1
						55350	VNN3
						29802	VPREB3
						55823	VPS11
						9559	VPS26A
						23339	VPS39
						27183	VPS4A
						55237	VRTN
						30813	VSX1
						64743	WDR13
						79446	WDR25
						11152	WDR45
						84942	WDR73
						80335	WDR82
						51398	WDR83OS
						80217	WDR96
						90199	WFDC8
						7485	WRB
						9671	WSCD2
						7504	XK
						55113	XKR8
						353515	XKRY2
						51087	YBX2
						29799	YPEL1
						80122	YSK4
						79740	ZBBX
						9278	ZBTB22
						7597	ZBTB25
						9880	ZBTB39
						10773	ZBTB6
						51043	ZBTB7B
						23144	ZC3H3
						55596	ZCCHC8
						55063	ZCWPW1
						150244	ZDHHC8P1
						85446	ZFHX2
						7539	ZFP37
						9372	ZFYVE9
						7547	ZIC3
						387032	ZKSCAN4
						79698	ZMAT4
						55954	ZMAT5
						7693	ZNF134
						7696	ZNF137P
						7700	ZNF141
						7712	ZNF157
						7728	ZNF175
						7733	ZNF180
						7741	ZNF187
						7745	ZNF192
						7746	ZNF193
						7757	ZNF208
						10520	ZNF211
						7988	ZNF212
						7638	ZNF221
						7673	ZNF222
						7766	ZNF223
						7768	ZNF225
						7773	ZNF230
						9310	ZNF235
						57209	ZNF248
						113835	ZNF257
						9422	ZNF264
						129025	ZNF280A
						25799	ZNF324
						80778	ZNF34
						25850	ZNF345
						140467	ZNF358
						149076	ZNF362
						22891	ZNF365
						79750	ZNF385D
						346157	ZNF391
						126299	ZNF428
						55663	ZNF446
						168544	ZNF467
						57573	ZNF471
						147657	ZNF480
						83744	ZNF484
						57615	ZNF492
						22847	ZNF507
						22869	ZNF510
						9658	ZNF516
						256051	ZNF549
						80032	ZNF556
						51276	ZNF571
						201514	ZNF584
						80095	ZNF606
						79898	ZNF613
						23361	ZNF629
						65243	ZNF643
						9726	ZNF646
						79788	ZNF665
						79891	ZNF671
						641339	ZNF674
						171392	ZNF675
						57116	ZNF695
						55762	ZNF701
						100131827	ZNF717
						7629	ZNF76
						79970	ZNF767
						7554	ZNF8
						7634	ZNF80
						90485	ZNF835
						148066	ZNRF4
						7783	ZP2
						7310	ZRSR1
						8233	ZRSR2
						79149	ZSCAN5A
						90204	ZSWIM1
						8385
						54744
						54792
						57825
						64173
						80093
						80112
						90477
						90925
						159110
						283079
						389722
						652147
						652919
						728142
						100129410
						100129500
						100130955
						100134017
						100287051
						100287602
						100287697
						100288270
						100288765
						100289775
						100293553
						100293792
						100294050
						100294451
