# Supplementary material for: Cancer Association Study of Aminoacyl-tRNA Synthetase Signaling Network in Glioblastoma
Source: PLoS One. 2012 Aug 31;7(8):e40960. doi: 10.1371/journal.pone.0040960 (PMC3432027; doi:10.1371/journal.pone.0040960)
Supplement: Table S3 — 31 DTG genes associated with ARSN. (XLS) [file pone.0040960.s026.xls]

## Sheet: TableS3
Table S3. 31 DTG genes associated with ARSN
Cluster #1:	202344_at	heat shock transcription factor 1	NM_005526	Hs.530227	HSF1	8q24.3
	212218_s_at	fatty acid synthase	AI954041	Hs.83190	FASN	17q25
	218991_at	HEAT repeat containing 6	NM_022070	Hs.591183	HEATR6	17q23.1
	65493_at	HEAT repeat containing 6	AA555088	Hs.591183	HEATR6	17q23.1
	215311_at	neurotrophic tyrosine kinase, receptor, type 3	AL109696	Hs.410969	NTRK3	15q25
	208760_at	ubiquitin-conjugating enzyme E2I (UBC9 homolog, yeast)	AL031714	Hs.302903	UBE2I	16p13.3
	214352_s_at	v-Ki-ras2 Kirsten rat sarcoma viral oncogene homolog	BF673699	Hs.505033	KRAS	12p12.1
	206492_at	fragile histidine triad gene	NM_002012	Hs.655995	FHIT	3p14.2
	204010_s_at	v-Ki-ras2 Kirsten rat sarcoma viral oncogene homolog	NM_004985	Hs.505033	KRAS	12p12.1
	213002_at	myristoylated alanine-rich protein kinase C substrate	AA770596	Hs.519909	MARCKS	6q22.2
Cluster #2:	201902_s_at	YY1 transcription factor	BG390664	Hs.388927	YY1	14q
	217949_s_at	vitamin K epoxide reductase complex, subunit 1	NM_024006	Hs.324844	VKORC1	16p11.2
	209239_at	nuclear factor of kappa light polypeptide gene enhancer in B-cells 1	M55643	Hs.654408	NFKB1	4q24
	201866_s_at	nuclear receptor subfamily 3, group C, member 1 (glucocorticoid receptor)	NM_000176	Hs.122926	NR3C1	5q31.3
	211300_s_at	tumor protein p53	K03199	Hs.654481	TP53	17p13.1
	207332_s_at	transferrin receptor (p90, CD71)	NM_003234	Hs.529618	TFRC	3q29
	214440_at	N-acetyltransferase 1 (arylamine N-acetyltransferase)	NM_000662	Hs.591847	NAT1	8p23.1-p21.3
	215719_x_at	Fas (TNF receptor superfamily, member 6)	X83493	Hs.244139	FAS	10q24.1
	216252_x_at	Fas (TNF receptor superfamily, member 6)	Z70519	Hs.244139	FAS	10q24.1
	204781_s_at	Fas (TNF receptor superfamily, member 6)	NM_000043	Hs.244139	FAS	10q24.1
	204780_s_at	Fas (TNF receptor superfamily, member 6)	NM_000043	Hs.244139	FAS	10q24.1
	212588_at	protein tyrosine phosphatase, receptor type, C	Y00062	Hs.654514	PTPRC	1q31-q32
	212671_s_at	major histocompatibility complex, class II, DQ alpha 1	BG397856	Hs.387679	HLA-DQA1	6p21.3
	207238_s_at	protein tyrosine phosphatase, receptor type, C	NM_002838	Hs.654514	PTPRC	1q31-q32
	206851_at	ribonuclease, RNase A family, 3 (eosinophil cationic protein)	NM_002935	Hs.73839	RNASE3	14q24-q31
	208018_s_at	hemopoietic cell kinase	NM_002110	Hs.655210	HCK	20q11-q12
	202803_s_at	integrin, beta 2 (complement component 3 receptor 3 and 4 subunit)	NM_000211	Hs.375957	ITGB2	21q22.3
	200663_at	CD63 molecule	NM_001780	Hs.445570	CD63	12q12-q13
	201146_at	nuclear factor (erythroid-derived 2)-like 2	NM_006164	Hs.155396	NFE2L2	2q31
	208729_x_at	major histocompatibility complex, class I, B	D83043	Hs.77961	HLA-B	6p21.3
	211911_x_at	major histocompatibility complex, class I, B	L07950	Hs.77961	HLA-B	6p21.3
