# Supplementary material for: Cancer Association Study of Aminoacyl-tRNA Synthetase Signaling Network in Glioblastoma
Source: PLoS One. 2012 Aug 31;7(8):e40960. doi: 10.1371/journal.pone.0040960 (PMC3432027; doi:10.1371/journal.pone.0040960)
Supplement: Table S4 — 16 DTGs correlated with three subgroups of ARSN. (XLS) [file pone.0040960.s027.xls]

## Sheet: CollateInfo
	FALSE	Matching:	Selected:	Variable:	Column:	Worksheet:	Experiment	BegIndex:	EndIndex:	Experiment Names	arstype00	type	original
InputFilePath	C:\WorkOPenDB\TCGA2ndWave -Project254\Output\expression\ARS vs CAG\Renorm ARS vs CAG -Project\TempSeparateFilesFolder1	TRUE	TRUE	Unique id	1		213672			213672	MARS	1	213672_at
InputFileName	matrix ARS vs CAG final (renorm).txt	FALSE	FALSE	Clone			213671			213671	MARS	1	213671_s_at
NumHeaders	1	FALSE	FALSE	Description			202042			202042	HARS	2	202042_at
Log Base	2	FALSE	FALSE	GB acc			200841			200841	EPRS	3	200841_s_at
Version	3.8.1	FALSE	FALSE	UG cluster			201475			201475	MARS	1	201475_x_at
cbOuputWkbk	Project.xls	FALSE	FALSE	Gene symbol			213907			213907	AIMP3	1	213907_at
ExpChunkSize	15	FALSE	FALSE				212048			212048	YARS	1	212048_s_at
ExpDescriptorsFilePath	C:\WorkOPenDB\TCGA2ndWave -Project254\Output\expression\ARS vs CAG	FALSE	FALSE	Probe set			200842			200842	EPRS	1	200842_s_at
ExpDescriptorsFileName	ExpDescFile.xls	1		ckBkgAdj			200843			200843	EPRS	1	200843_s_at
iDialogType	5.1		FALSE	Red intensity			201624			201624	DARS	2	201624_at
NumExp	36		FALSE	Green intensity			216602			216602	FARSA	3	216602_s_at
NumVariables			FALSE	Red background			200802			200802	SARS	2	200802_at
NumExpDescriptors	4		FALSE	Green background			202159			202159	FARSA	1	202159_at
NumUniqueGenes	168		FALSE	Sd. of red background			202402			202402	CARS	2	202402_s_at
ColumnExp			FALSE	Sd. of green background			201330			201330	RARS	3	201330_at
NumCols	1		FALSE	Spot flag			201797			201797	VARS	1	201797_s_at
NumIdCols	2		FALSE	Spot size			217846			217846	QARS	1	217846_at
IdPosition	1		FALSE	Number of red pixels			200027			200027	NARS	1	200027_at
FirstBlockCol	TRUE		FALSE	Number of green pixels			201796			201796	VARS	3	201796_s_at
ckReverseFluor	FALSE		FALSE				200840			200840	KARS	1	200840_at
ReverseFluorColumn	0		FALSE				201000			201000	AARS	2	201000_at
ReverseFluorLabel			TRUE	Raw log ratio	2		209971			209971	AIMP2	2	209971_x_at
1. ckIntensityFilter	FALSE		TRUE	Gene identifiers		Gene identifiers	217810			217810	LARS	1	217810_x_at
2. MinExp			TRUE	Filtered log ratio			202138			202138	AIMP2	2	202138_x_at
3. RedThreshold	10		TRUE	Red (bkg-adjusted)			202542			202542	AIMP1	3	202542_s_at
4. GreenThreshold	100		TRUE	Green (bkg-adjusted)			201623			201623	DARS	2	201623_s_at
5. opAND	FALSE			ColumnMatchKey			200079			200079	KARS	3	200079_s_at
6. opOR	FALSE		FALSE	GeneIdentifierFile			209972			209972	AIMP2	1	209972_s_at
7. ckLogRatioFilter	FALSE			SigmaSqMedian	0		212971			212971	CARS	1	212971_at
8. SignifLevel	0.01	AlreadyLogTransformed	TRUE	Raw log intensity	2	Raw log intensity	201263			201263	TARS	3	201263_at
9. ckFlagFilter	FALSE		TRUE	Filtered log intensity		Filtered log intensity	208693			208693	GARS	2	208693_s_at
10. FlagMinimum	0			GeneIdColumnKey			200628			200628	WARS	3	200628_s_at
11. FlagMaximum	0			AlignGeneId	1		204744			204744	IARS	2	204744_s_at
12. ChangedIntensity	FALSE		FALSE	Entered log-ratios			200629			200629	WARS	3	200629_at
13. ChangegdLogRatio	FALSE	RedoGOExpected	ResendFilterData	BinaryDataSignature:	8197377	9878504	202541			202541	AIMP1	2	202541_at
14. ChangedFlag	FALSE			cbGeneChips			204905			204905	AIMP3	2	204905_s_at
15. ckNormalize	FALSE		FALSE	IsAffy
16. ChangedNormalize	FALSE			IsPivotTable	FALSE
17. opSignifLevel	TRUE		FALSE	ckCodeLink
18. Percentile	75			LatestVersionUsed	3.8.1 - stable Release
19. DataWkbkName	Project.xls			LocusLink
20. ckMissingValueFilter	FALSE			SwissProt
21. TextBoxPercentMissing	50			Ensembl ID
22. ChangedMissing	FALSE			References
23. ckSizeFilter	FALSE			Bilogical Process (GO)
24. Size Minimum	10			Cellular Component (GO)
25. ChangedSize	FALSE			Molecular Function (GO)
26. ckLogTransform	TRUE			PrintTipGroup
27. ckTruncate	FALSE				FALSE
28. TextBoxTruncate	10000
29. ChangedTruncate	FALSE
30. IsSingleChannel	TRUE
31. opThreshold	TRUE
32. ckFlagRange	TRUE
33. ckFlagListValues	FALSE
34. TextBoxFlagListValues
35. opNormalizeMedian	TRUE
36. opNormalizeLowess	FALSE
37. ReadFromRaw	FALSE
38. PreviousRunSuccessful	TRUE
39. opNormalizeHousekeeping	FALSE
40. opU133	TRUE
41. opU95	FALSE
42. opSpecifyGenelist	FALSE
43. TextBoxHousekeepingGenes
44. ckFoldDiffFilter	FALSE
45. TextBoxPercentAboveFoldDiff	20
46. TextBoxFoldDiff	1.5
47. ChangedFoldDiff	FALSE
48. ckDetectionCallFilter	FALSE
49. TextBoxPercentAbsent	50
50. ChangedDetection	FALSE
51. ckNormalizeUsingMedianArray	TRUE
52. cbUserSelectedReferenceArray
53. ckGeneLabelFilter	FALSE
54. cbGeneId
55. TextBoxGeneLabel	Empty
56. ChangedGeneLabelFilter	FALSE
57. ckGeneSubsets	TRUE
58. opUseSelected	TRUE
59. opUseAllExceptSelected	FALSE
60. ChangedGeneSubsets	FALSE
61.opNormalizeMedianPrintTip	FALSE
62.opNormalizeLowessPrintTip	FALSE
63.opBiocartaHuman	User Gene List
	FALSE
	#N/A

## Sheet: GeneSubsets
Name	File	Type	Folder	Selected
0TraiT Analysis005forARS(16)	0TraiT Analysis005forARS(16).txt	Unique id	Analysis	1
0TraitAnal005forARS(16)	0TraitAnal005forARS(16).txt	Unique id	Analysis	0
ClassComparison	ClassComparison.txt	Unique id	Analysis	0
ClassComparison001	ClassComparison001.txt	Unique id	Analysis	0
ClassComparison005	ClassComparison005.txt	Unique id	Analysis	0
ClassComparison005random	ClassComparison005random.txt	Unique id	Analysis	0
CorrelationAnalysis	CorrelationAnalysis.txt	Unique id	Analysis	0
CorrelationAnalysis001pearson	CorrelationAnalysis001pearson.txt	Unique id	Analysis	0
CorrelationAnalysis005forARS	CorrelationAnalysis005forARS.txt	Unique id	Analysis	0
CorrelationAnalysis005Pearson	CorrelationAnalysis005Pearson.txt	Unique id	Analysis	0
CorrelationAnalysis00Kendall	CorrelationAnalysis00Kendall.txt	Unique id	Analysis	0
CorrelationAnalysis00Spearman	CorrelationAnalysis00Spearman.txt	Unique id	Analysis	0
CorrelationAnalysis01Pearson1	CorrelationAnalysis01Pearson1.txt	Unique id	Analysis	0
CorrelationAnalysis02Pearson1	CorrelationAnalysis02Pearson1.txt	Unique id	Analysis	0
CorrelationAnalysis05Pearson1	CorrelationAnalysis05Pearson1.txt	Unique id	Analysis	0
Example- Apoptosis	Example- Apoptosis.txt	Clone	User	0
Example- Cell_cycle	Example- Cell_cycle.txt	Clone	User	0
Example- DNA_replication	Example- DNA_replication.txt	Clone	User	0
Example- Drug_metabolism	Example- Drug_metabolism.txt	Clone	User	0
Example- Kinase	Example- Kinase.txt	Clone	User	0
Example- Phosphatase	Example- Phosphatase.txt	Clone	User	0
Example- Proliferation	Example- Proliferation.txt	Clone	User	0
Example- Protease	Example- Protease.txt	Clone	User	0
Example- Replication	Example- Replication.txt	Clone	User	0
Example- Signaling	Example- Signaling.txt	Clone	User	0
Example- Transcription	Example- Transcription.txt	Clone	User	0
Example- Translation	Example- Translation.txt	Clone	User	0
HG-Focus_HouseKeeping	HG-Focus_HouseKeeping.txt	Probe set	User	0
HG-U133_Housekeeping	HG-U133_Housekeeping.txt	Probe set	User	0
HG-U95_Housekeeping	HG-U95_Housekeeping.txt	Probe set	User	0
Perou's- Intrinsic- Breast-Cancer-Genes	Perou's- Intrinsic- Breast-Cancer-Genes.txt	Clone GB acc UG cluster Gene Symbol	User	0
angiogenesis	angiogenesis.htm		CGAP	0
apoptosis	apoptosis.htm		CGAP	0
behavior	behavior.htm		CGAP	0
cell_cycle	cell_cycle.htm		CGAP	0
cell_signaling	cell_signaling.htm		CGAP	0
development	development.htm		CGAP	0
DNA_adducts	DNA_adducts.htm		CGAP	0
DNA_damage	DNA_damage.htm		CGAP	0
DNA_replication	DNA_replication.htm		CGAP	0
gene_regulation	gene_regulation.htm		CGAP	0
immunology	immunology.htm		CGAP	0
metabolism	metabolism.htm		CGAP	0
metastasis	metastasis.htm		CGAP	0
misc	misc.htm		CGAP	0
pharmacology	pharmacology.htm		CGAP	0
signal_transduction	signal_transduction.htm		CGAP	0
transcription	transcription.htm		CGAP	0
tsonc	tsonc.htm		CGAP	0
1- and 2-Methylnaphthalene degradation	hsa00624		KEGG	0
1,1,1-Trichloro-2,2-bis(4-chlorophenyl)ethane (DDT) degradation	hsa00351		KEGG	0
2,4-Dichlorobenzoate degradation	hsa00623		KEGG	0
Adherens junction	hsa04520		KEGG	0
Adipocytokine signaling pathway	hsa04920		KEGG	0
Alanine and aspartate metabolism	hsa00252		KEGG	0
Alkaloid biosynthesis I	hsa00950		KEGG	0
Alkaloid biosynthesis II	hsa00960		KEGG	0
Alzheimer\'s disease	hsa05010		KEGG	0
Aminoacyl-tRNA biosynthesis	hsa00970		KEGG	0
Aminophosphonate metabolism	hsa00440		KEGG	0
Aminosugars metabolism	hsa00530		KEGG	0
Amyotrophic lateral sclerosis (ALS)	hsa05030		KEGG	0
Androgen and estrogen metabolism	hsa00150		KEGG	0
Antigen processing and presentation	hsa04612		KEGG	0
Apoptosis	hsa04210		KEGG	0
Arachidonic acid metabolism	hsa00590		KEGG	0
Arginine and proline metabolism	hsa00330		KEGG	0
Ascorbate and aldarate metabolism	hsa00053		KEGG	0
ATP synthesis	hsa00193		KEGG	0
Atrazine degradation	hsa00791		KEGG	0
Axon guidance	hsa04360		KEGG	0
B cell receptor signaling pathway	hsa04662		KEGG	0
Basal transcription factors	hsa03022		KEGG	0
Benzoate degradation via CoA ligation	hsa00632		KEGG	0
Benzoate degradation via hydroxylation	hsa00362		KEGG	0
beta-Alanine metabolism	hsa00410		KEGG	0
Bile acid biosynthesis	hsa00120		KEGG	0
Biosynthesis of steroids	hsa00100		KEGG	0
Biotin metabolism	hsa00780		KEGG	0
Bisphenol A degradation	hsa00363		KEGG	0
Butanoate metabolism	hsa00650		KEGG	0
C21-Steroid hormone metabolism	hsa00140		KEGG	0
C5-Branched dibasic acid metabolism	hsa00660		KEGG	0
Calcium signaling pathway	hsa04020		KEGG	0
Caprolactam degradation	hsa00930		KEGG	0
Carbazole degradation	hsa00629		KEGG	0
Carbon fixation	hsa00710		KEGG	0
Cell adhesion molecules (CAMs)	hsa04514		KEGG	0
Cell Communication	hsa01430		KEGG	0
Cell cycle	hsa04110		KEGG	0
Chondroitin sulfate biosynthesis	hsa00532		KEGG	0
Circadian rhythm	hsa04710		KEGG	0
Citrate cycle (TCA cycle)	hsa00020		KEGG	0
Colorectal cancer	hsa05210		KEGG	0
Complement and coagulation cascades	hsa04610		KEGG	0
Cyanoamino acid metabolism	hsa00460		KEGG	0
Cysteine metabolism	hsa00272		KEGG	0
Cytokine-cytokine receptor interaction	hsa04060		KEGG	0
D-Arginine and D-ornithine metabolism	hsa00472		KEGG	0
Dentatorubropallidoluysian atrophy (DRPLA)	hsa05050		KEGG	0
D-Glutamine and D-glutamate metabolism	hsa00471		KEGG	0
Diterpenoid biosynthesis	hsa00904		KEGG	0
DNA polymerase	hsa03030		KEGG	0
Dorso-ventral axis formation	hsa04320		KEGG	0
ECM-receptor interaction	hsa04512		KEGG	0
Epithelial cell signaling in Helicobacter pylori infection	hsa05120		KEGG	0
Ethylbenzene degradation	hsa00642		KEGG	0
Fatty acid biosynthesis	hsa00061		KEGG	0
Fatty acid elongation in mitochondria	hsa00062		KEGG	0
Fatty acid metabolism	hsa00071		KEGG	0
Fc epsilon RI signaling pathway	hsa04664		KEGG	0
Fluorene degradation	hsa00628		KEGG	0
Focal adhesion	hsa04510		KEGG	0
Folate biosynthesis	hsa00790		KEGG	0
Fructose and mannose metabolism	hsa00051		KEGG	0
Galactose metabolism	hsa00052		KEGG	0
gamma-Hexachlorocyclohexane degradation	hsa00361		KEGG	0
Gap junction	hsa04540		KEGG	0
Glutamate metabolism	hsa00251		KEGG	0
Glutathione metabolism	hsa00480		KEGG	0
Glycan structures - biosynthesis 1	hsa01030		KEGG	0
Glycan structures - biosynthesis 2	hsa01031		KEGG	0
Glycan structures - degradation	hsa01032		KEGG	0
Glycerolipid metabolism	hsa00561		KEGG	0
Glycerophospholipid metabolism	hsa00564		KEGG	0
Glycine, serine and threonine metabolism	hsa00260		KEGG	0
Glycolysis / Gluconeogenesis	hsa00010		KEGG	0
Glycosaminoglycan degradation	hsa00531		KEGG	0
Glycosphingolipid biosynthesis - ganglioseries	hsa00604		KEGG	0
Glycosphingolipid biosynthesis - globoseries	hsa00603		KEGG	0
Glycosphingolipid biosynthesis - lactoseries	hsa00601		KEGG	0
Glycosphingolipid biosynthesis - neo-lactoseries	hsa00602		KEGG	0
Glycosylphosphatidylinositol(GPI)-anchor biosynthesis	hsa00563		KEGG	0
Glyoxylate and dicarboxylate metabolism	hsa00630		KEGG	0
GnRH signaling pathway	hsa04912		KEGG	0
Hedgehog signaling pathway	hsa04340		KEGG	0
Hematopoietic cell lineage	hsa04640		KEGG	0
Heparan sulfate biosynthesis	hsa00534		KEGG	0
Histidine metabolism	hsa00340		KEGG	0
Huntington\'s disease	hsa05040		KEGG	0
Inositol metabolism	hsa00031		KEGG	0
Inositol phosphate metabolism	hsa00562		KEGG	0
Insulin signaling pathway	hsa04910		KEGG	0
Jak-STAT signaling pathway	hsa04630		KEGG	0
Keratan sulfate biosynthesis	hsa00533		KEGG	0
Leukocyte transendothelial migration	hsa04670		KEGG	0
Limonene and pinene degradation	hsa00903		KEGG	0
Linoleic acid metabolism	hsa00591		KEGG	0
Long-term depression	hsa04730		KEGG	0
Long-term potentiation	hsa04720		KEGG	0
Lysine biosynthesis	hsa00300		KEGG	0
Lysine degradation	hsa00310		KEGG	0
MAPK signaling pathway	hsa04010		KEGG	0
Maturity onset diabetes of the young	hsa04950		KEGG	0
Metabolism of xenobiotics by cytochrome P450	hsa00980		KEGG	0
Methane metabolism	hsa00680		KEGG	0
Methionine metabolism	hsa00271		KEGG	0
Monoterpenoid biosynthesis	hsa00902		KEGG	0
mTOR signaling pathway	hsa04150		KEGG	0
NA	hsa05130		KEGG	0
NA	hsa05131		KEGG	0
Natural killer cell mediated cytotoxicity	hsa04650		KEGG	0
Neuroactive ligand-receptor interaction	hsa04080		KEGG	0
Neurodegenerative Disorders	hsa01510		KEGG	0
N-Glycan biosynthesis	hsa00510		KEGG	0
N-Glycan degradation	hsa00511		KEGG	0
Nicotinate and nicotinamide metabolism	hsa00760		KEGG	0
Nitrobenzene degradation	hsa00626		KEGG	0
Nitrogen metabolism	hsa00910		KEGG	0
Notch signaling pathway	hsa04330		KEGG	0
Novobiocin biosynthesis	hsa00401		KEGG	0
Nucleotide sugars metabolism	hsa00520		KEGG	0
O-Glycan biosynthesis	hsa00512		KEGG	0
Olfactory transduction	hsa04740		KEGG	0
One carbon pool by folate	hsa00670		KEGG	0
Oxidative phosphorylation	hsa00190		KEGG	0
Pantothenate and CoA biosynthesis	hsa00770		KEGG	0
Parkinson\'s disease	hsa05020		KEGG	0
Pentose and glucuronate interconversions	hsa00040		KEGG	0
Pentose phosphate pathway	hsa00030		KEGG	0
Peptidoglycan biosynthesis	hsa00550		KEGG	0
Phenylalanine metabolism	hsa00360		KEGG	0
Phenylalanine, tyrosine and tryptophan biosynthesis	hsa00400		KEGG	0
Phosphatidylinositol signaling system	hsa04070		KEGG	0
Porphyrin and chlorophyll metabolism	hsa00860		KEGG	0
PPAR signaling pathway	hsa03320		KEGG	0
Prion disease	hsa05060		KEGG	0
Propanoate metabolism	hsa00640		KEGG	0
Proteasome	hsa03050		KEGG	0
Protein export	hsa03060		KEGG	0
Purine metabolism	hsa00230		KEGG	0
Pyrimidine metabolism	hsa00240		KEGG	0
Pyruvate metabolism	hsa00620		KEGG	0
Reductive carboxylate cycle (CO2 fixation)	hsa00720		KEGG	0
Regulation of actin cytoskeleton	hsa04810		KEGG	0
Regulation of autophagy	hsa04140		KEGG	0
Retinol metabolism	hsa00830		KEGG	0
Riboflavin metabolism	hsa00740		KEGG	0
Ribosome	hsa03010		KEGG	0
RNA polymerase	hsa03020		KEGG	0
Selenoamino acid metabolism	hsa00450		KEGG	0
SNARE interactions in vesicular transport	hsa04130		KEGG	0
Sphingolipid metabolism	hsa00600		KEGG	0
Starch and sucrose metabolism	hsa00500		KEGG	0
Stilbene, coumarine and lignin biosynthesis	hsa00940		KEGG	0
Streptomycin biosynthesis	hsa00521		KEGG	0
Styrene degradation	hsa00643		KEGG	0
Sulfur metabolism	hsa00920		KEGG	0
Synthesis and degradation of ketone bodies	hsa00072		KEGG	0
T cell receptor signaling pathway	hsa04660		KEGG	0
Taste transduction	hsa04742		KEGG	0
Taurine and hypotaurine metabolism	hsa00430		KEGG	0
Terpenoid biosynthesis	hsa00900		KEGG	0
Tetrachloroethene degradation	hsa00625		KEGG	0
TGF-beta signaling pathway	hsa04350		KEGG	0
Thiamine metabolism	hsa00730		KEGG	0
Tight junction	hsa04530		KEGG	0
Toll-like receptor signaling pathway	hsa04620		KEGG	0
Tryptophan metabolism	hsa00380		KEGG	0
Type I diabetes mellitus	hsa04940		KEGG	0
Type II diabetes mellitus	hsa04930		KEGG	0
Tyrosine metabolism	hsa00350		KEGG	0
Ubiquinone biosynthesis	hsa00130		KEGG	0
Ubiquitin mediated proteolysis	hsa04120		KEGG	0
Urea cycle and metabolism of amino groups	hsa00220		KEGG	0
Valine, leucine and isoleucine biosynthesis	hsa00290		KEGG	0
Valine, leucine and isoleucine degradation	hsa00280		KEGG	0
VEGF signaling pathway	hsa04370		KEGG	0
Vitamin B6 metabolism	hsa00750		KEGG	0
Wnt signaling pathway	hsa04310		KEGG	0

## Sheet: TableS4
Table S4. 16 DTGs correlated with three subgroups of ARSN
Cluster #1:	214352_s_at	v-Ki-ras2 Kirsten rat sarcoma viral oncogene homolog	BF673699	Hs.505033	KRAS	12p12.1
	216115_at	neurofibromin 1	AK024873	Hs.113577	NF1	17q11.2
	207608_x_at	cytochrome P450, family 1, subfamily A, polypeptide 2	NM_000761	Hs.1361	CYP1A2	15q24
	211914_x_at	neurofibromin 1	M60915	Hs.113577	NF1	17q11.2
	213536_s_at	ubiquitin-conjugating enzyme E2I (UBC9 homolog, yeast)	AA910614	Hs.302903	UBE2I	16p13.3
	204010_s_at	v-Ki-ras2 Kirsten rat sarcoma viral oncogene homolog	NM_004985	Hs.505033	KRAS	12p12.1
	213002_at	myristoylated alanine-rich protein kinase C substrate	AA770596	Hs.519909	MARCKS	6q22.2
Cluster #2:	211911_x_at	major histocompatibility complex, class I, B	L07950	Hs.77961	HLA-B	6p21.3
	220407_s_at	transforming growth factor, beta 2	NM_003238	Hs.133379	TGFB2	1q41
	209909_s_at	transforming growth factor, beta 2	M19154	Hs.133379	TGFB2	1q41
	211300_s_at	tumor protein p53	K03199	Hs.654481	TP53	17p13.1
	201902_s_at	YY1 transcription factor	BG390664	Hs.388927	YY1	14q
	209101_at	connective tissue growth factor	M92934	Hs.591346	CTGF	6q23.1
	217949_s_at	vitamin K epoxide reductase complex, subunit 1	NM_024006	Hs.324844	VKORC1	16p11.2
	209239_at	nuclear factor of kappa light polypeptide gene enhancer in B-cells 1	M55643	Hs.654408	NFKB1	4q24
	201866_s_at	nuclear receptor subfamily 3, group C, member 1 (glucocorticoid receptor)	NM_000176	Hs.122926	NR3C1	5q31.3
