# Supplementary material for: Cancer Association Study of Aminoacyl-tRNA Synthetase Signaling Network in Glioblastoma
Source: PLoS One. 2012 Aug 31;7(8):e40960. doi: 10.1371/journal.pone.0040960 (PMC3432027; doi:10.1371/journal.pone.0040960)
Supplement: Table S5 — 122 probe sets correlated with survival in patients with GBM. (XLS) [file pone.0040960.s028.xls]

## Sheet: TableS5
Table S5. 122 probe sets correlated with survival in patients with GBM
1316_at	THRA
200027_at	NARS
200598_s_at	HSP90B1
200599_s_at	HSP90B1
200632_s_at	NDRG1
200910_at	CCT3
201098_at	COPB2
201255_x_at	BAT3
201668_x_at	MARCKS
201781_s_at	AIP
201796_s_at	VARS
202159_at	FARSA
202247_s_at	MTA1
202367_at	CUX1
202402_s_at	CARS
202410_x_at	IGF2
202424_at	MAP2K2
202520_s_at	MLH1
202586_at	POLR2L
202609_at	EPS8
202859_x_at	IL8
202905_x_at	NBN
202933_s_at	YES1
203270_at	DTYMK
203319_s_at	ZNF148
203680_at	PRKAR2B
204185_x_at	PPID
204186_s_at	PPID
204253_s_at	VDR
204325_s_at	NF1
204413_at	TRAF2
204735_at	PDE4A
204780_s_at	FAS
204858_s_at	TYMP
205051_s_at	KIT
205397_x_at	SMAD3
205402_x_at	PRSS2
205558_at	TRAF6
205568_at	AQP9
205731_s_at	NCOA2
206210_s_at	CETP
206320_s_at	SMAD9
206503_x_at	PML
206754_s_at	CYP2B6
206789_s_at	POU2F1
206846_s_at	HDAC6
206923_at	PRKCA
207023_x_at	KRT10
207233_s_at	MITF
207238_s_at	PTPRC
207332_s_at	TFRC
207463_x_at	PRSS3
207525_s_at	GIPC1
207550_at	MPL
208284_x_at	GGT1
208286_x_at	POU5F1
208691_at	TFRC
208696_at	CCT5
208870_x_at	ATP5C1
209148_at	RXRB
209409_at	GRB10
209659_s_at	CDC16
209903_s_at	ATR
210012_s_at	EWSR1
210094_s_at	PARD3
210187_at	FKBP1A
210208_x_at	BAT3
210211_s_at	HSP90AA1
210226_at	NR4A1
210356_x_at	MS4A1
210617_at	PHEX
210633_x_at	KRT10
210881_s_at	IGF2
210916_s_at	CD44
211342_x_at	MED12
211447_s_at	PDE4A
211762_s_at	KPNA2
211928_at	DYNC1H1
211936_at	HSPA5
211968_s_at	HSP90AA1
211969_at	HSP90AA1
212249_at	PIK3R1
212363_x_at	ACTG1
212448_at	NEDD4L
212520_s_at	SMARCA4
212550_at	STAT5B
212589_at	RRAS2
212687_at	LIMS1
212758_s_at	ZEB1
212971_at	CARS
213046_at	PABPN1
213137_s_at	PTPN2
213287_s_at	KRT10
213366_x_at	ATP5C1
213720_s_at	SMARCA4
213775_x_at	ZNF638
214062_x_at	NFKBIB
214328_s_at	HSP90AA1
214626_s_at	GANAB
215157_x_at	PABPC1
215248_at	GRB10
215605_at	NCOA2
215757_at	PRKDC
216071_x_at	MED12
216602_s_at	FARSA
216685_s_at	MTAP
216938_x_at	DRD2
216940_x_at	YBX1
217190_x_at	ESR1
217294_s_at	ENO1
217476_at	THRA
217602_at	PPIA
217834_s_at	SYNCRIP
217846_at	QARS
218292_s_at	PRKAG2
219140_s_at	RBP4
221526_x_at	PARD3
221582_at	HIST3H2A
221891_x_at	HSPA8
320_at	PEX6
AFFX-HUMISGF3A/M97935_MA_at	STAT1
209919_x_at	GGT1
